# Supplementary material for: Replication of biocompatible, nanotopographic surfaces
Source: PubMed Central journal article supplement (PMC5766624; doi:10.1038/s41598-017-19008-z), 2018-01-12
Supplement: 41598_2017_19008_MOESM1_ESM.pdf [file 41598_2017_19008_MOESM1_ESM.pdf]

Supplementary Figures for:

## **Replication of biocompatible, nanotopographic surfaces**

Xiaoyu Sun<sup>1</sup>, Matt J. Hourwitz<sup>1</sup>, Eleni M. Baker<sup>1</sup>, B. U. Sebastian Schmidt<sup>2</sup>, Wolfgang Losert<sup>2,3,5\*</sup>, John T. Fourkas<sup>1,2,4,5,\*</sup>

<sup>1</sup>Department of Chemistry and Biochemistry, University of Maryland, College Park, MD 20742

<sup>2</sup>Institute for Physical Science and Technology, University of Maryland, College Park, MD 20742

<sup>3</sup>Department of Physics, University of Maryland, College Park, MD 20742

<sup>4</sup>Center for Nanophysics and Advanced Materials, University of Maryland, College Park, MD 20742

<sup>5</sup>Maryland NanoCenter, University of Maryland, College Park, MD 20742

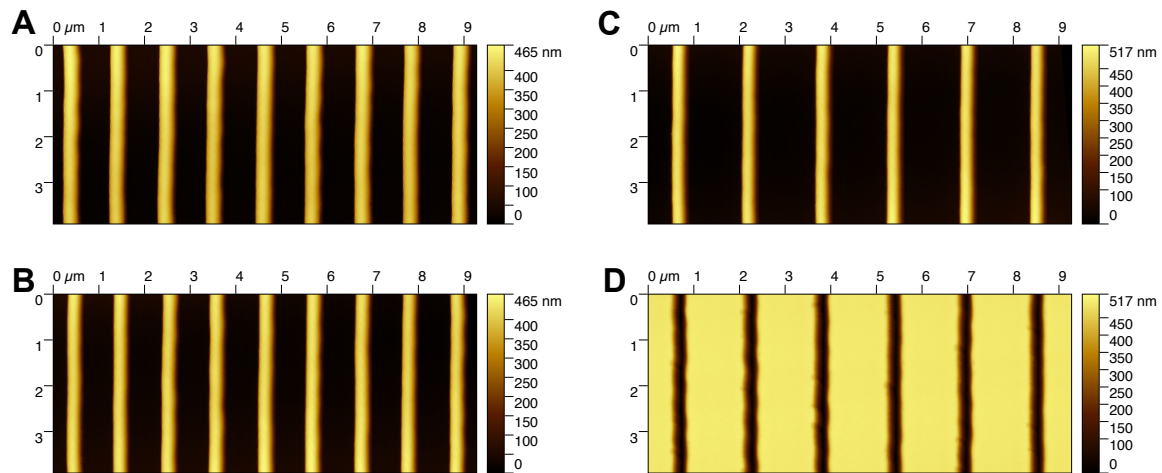

**Supplementary Figure 1.** AFMs of 1- $\mu$ m-spaced master (A) and replica (B) ridges, and 1.5- $\mu$ m-spaced replica ridges (C) and grooves (D).

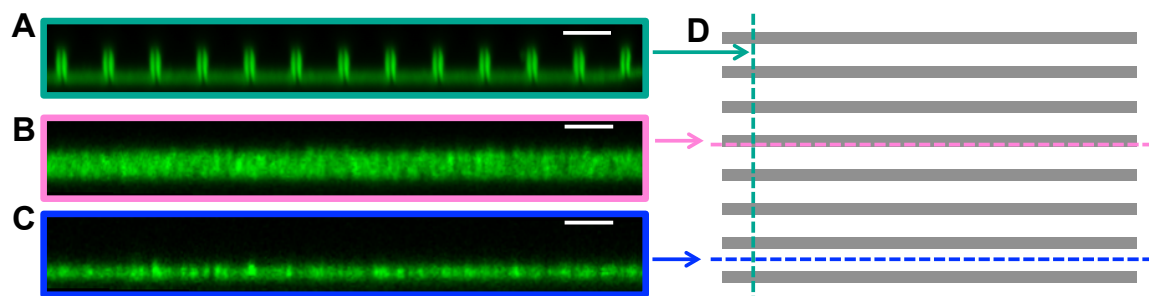

**Supplementary Figure 2.** Functionalization of nanoridges with fluorescently labeled fibronectin. (A-C) Side-view images of the fluorescent-fibronectin-coated nanoridges reconstructed from z-stack confocal images. The planes are perpendicular to the surface in the position of the dashed lines in (D) of the color of the image borders. Scale bars, 3  $\mu$ m.

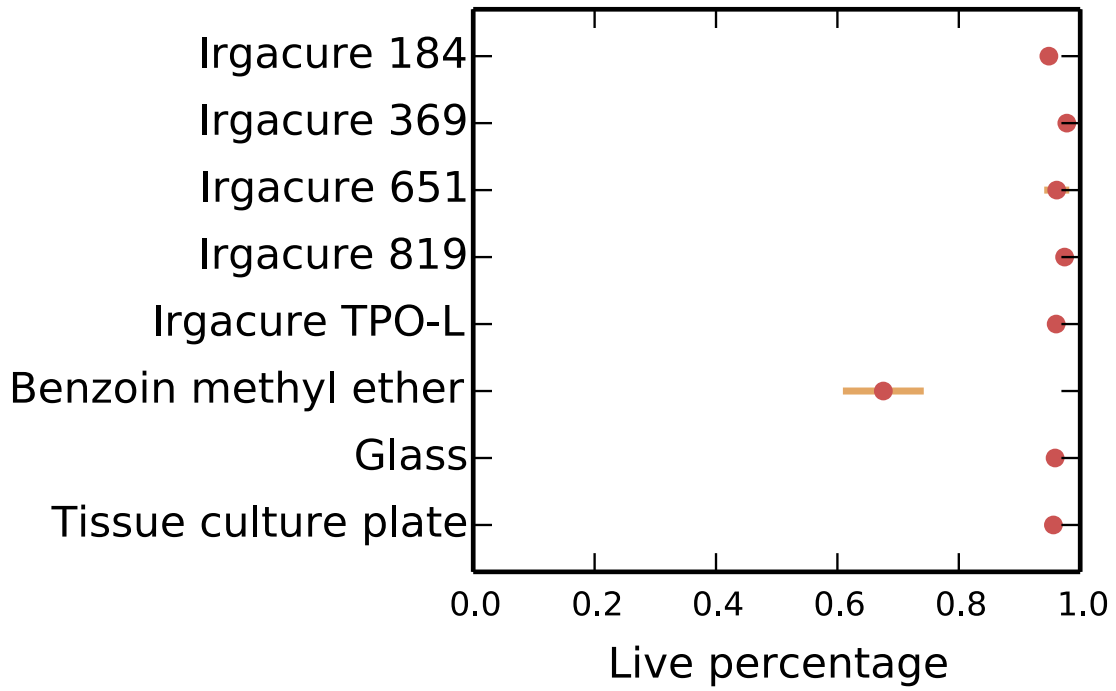

**Supplementary Figure 3.** Live percentages of cells plated on nanoridges replicated with various photoinitiators. Error bars represent the standard error of the mean.
